# Supplementary material
Source: PubMed Central journal article supplement (PMC4176838)

## Online resource 2

Transcriptome analysis of peripheral blood mononuclear cells in human subjects following a 36 hour fast provides evidence of effects on genes regulating inflammation and apoptosis as well as energy metabolism. **Genes and Nutrition.** Elliott RM<sup>1,2\*</sup>, de Roos B<sup>3</sup>, Duthie SJ<sup>3,4</sup>, Bouwman FG<sup>5</sup>, Rubio-Aliaga I<sup>6,7</sup>, Crosley LK<sup>3</sup>, Mayer C<sup>8</sup>, Polley AC<sup>1</sup>, Heim C<sup>6</sup>, Coort SL<sup>9</sup>, Evelo CT<sup>9</sup>, Mulholland F<sup>1</sup>, Daniel H<sup>6</sup>, Mariman EC<sup>5</sup> and Johnson IT<sup>1</sup>

<sup>1</sup> Institute of Food Research, Colney Lane, Norwich, UK; <sup>2</sup> Nutritional Sciences Division, Faculty of Health and Medical Sciences, University of Surrey, Guildford, GU2 7XH; <sup>3</sup> Rowett Institute of Nutrition and Health, University of Aberdeen, Aberdeen, UK; <sup>4</sup> School of Pharmacy and Life Sciences, The Robert Gordon University, Aberdeen, UK; <sup>5</sup> Department of Human Biology, NUTRIM, Maastricht University, Maastricht, the Netherlands; <sup>6</sup> Molecular Nutrition Unit, ZIEL - Research Center for Nutrition and Food Sciences, Technische Universität München, Freising-Weihenstephan, Germany; <sup>7</sup> Institute of Physiology, Zurich Center for Integrative Human Physiology, University of Zurich, Zurich, Switzerland; <sup>8</sup> Biomathematics and Statistics Scotland, Aberdeen, UK; <sup>9</sup> Department of Bioinformatics - BiGCaT, NUTRIM, Maastricht University, Maastricht, the Netherlands

\* Author for correspondence. email: r.m.elliott@surrey.ac.uk. Telephone +44 (0)1483 683843

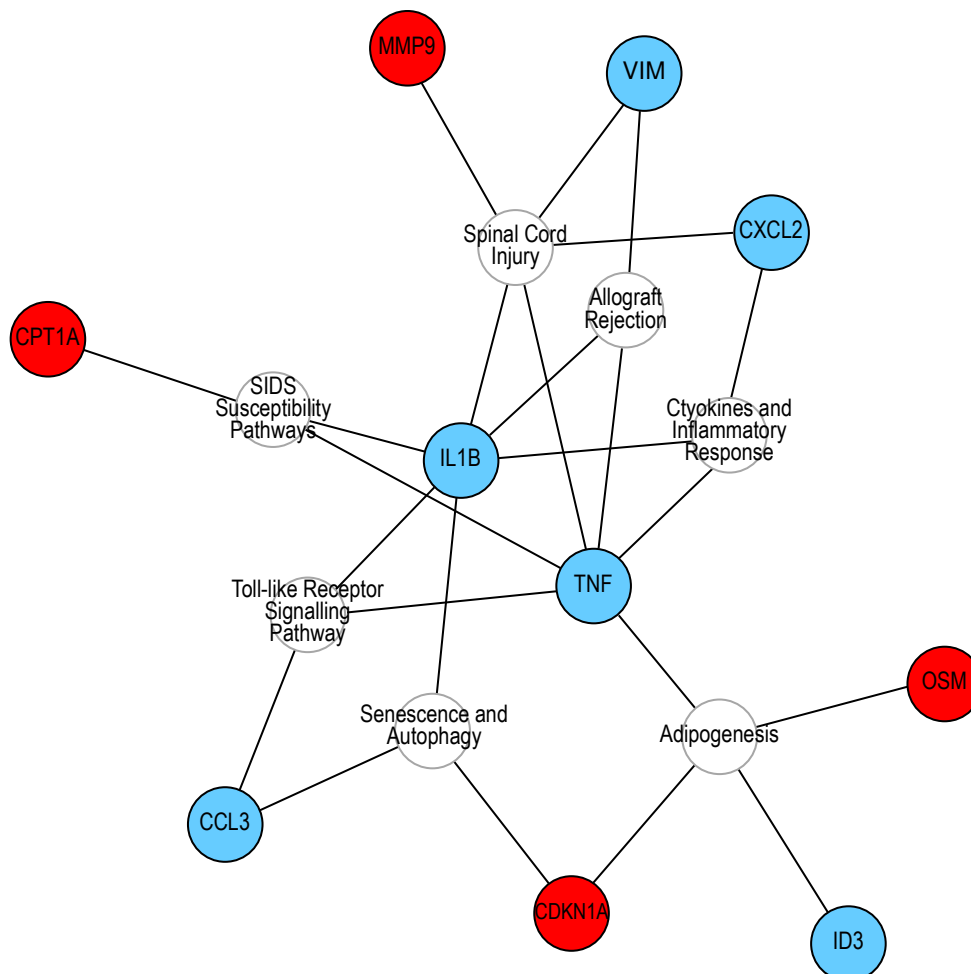

Supplement: 12263_2014_432_MOESM2_ESM.pdf [file 12263_2014_432_MOESM2_ESM.pdf]
